# Supplementary material for: Subamolide B Isolated from Medicinal PlantCinnamomum subaveniumInduces Cytotoxicity in Human Cutaneous Squamous Cell Carcinoma Cells through Mitochondrial and CHOP-Dependent Cell Death Pathways
Source: Hindawi journal article supplement (doi:10.1155/2013/630415), 2013-01-01

## Supplementary Figure Legends (Yang et al.)

**Supplementary Figure 1. Chemical structure of subamolide B.** The structure of subamolide B [(3*E*,4*R*,5*R*)-3-tetradecylidene-4-hydroxy-5-methoxy-5-methylbutanolide] is presented.

**Supplementary Figure 2. Kinetic analysis of component molecules involved in the extrinsic, intrinsic and ER stress cell death pathways upon subamolide B stimulation.** SCC12 cells were treated with subamolide B (20  $\mu$ M) for 24 h, and the levels of proteins involved in the extrinsic (FasL, Fas), intrinsic (BCL-2, BAX) and ER stress (GRP78, CHOP) pathways were determined at indicated time points by immunoblotting.  $\beta$ -tubulin was used as the loading control.

**Supplementary Figure 3. SCC12 cells were resistant to imiquimod-induced cytotoxicity.** SCC12 cells were treated with increasing doses of subamolide B (0~20  $\mu$ M) (A) or imiquimod (0~50  $\mu$ g/ml) (B) for 24 h, and the viability of imiquimod-treated cells was evaluated thereafter. It is noted that 20  $\mu$ M (6.897  $\mu$ g/ml) of subamolide B reduced the viability of SCC12 cells to  $50.47\pm 5.89\%$  compared to the drug-untreated control, whereas  $65.00\pm 4.32\%$  of SCC12 cells were still viable after treatment with 50  $\mu$ g/ml of imiquimod.

**Supplementary Figure 1** (Yang et al.)

**Subamolide B** (C<sub>20</sub>H<sub>36</sub>O<sub>4</sub>; MW: 340.2614)

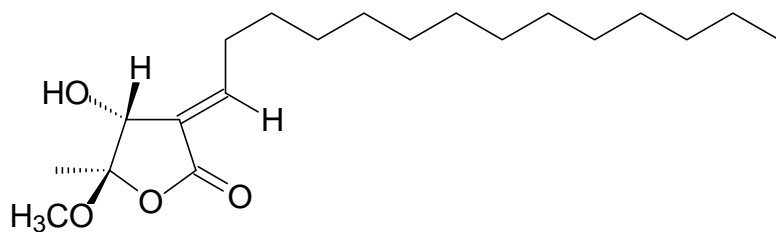

**Supplementary Figure 2** (Yang et al.)

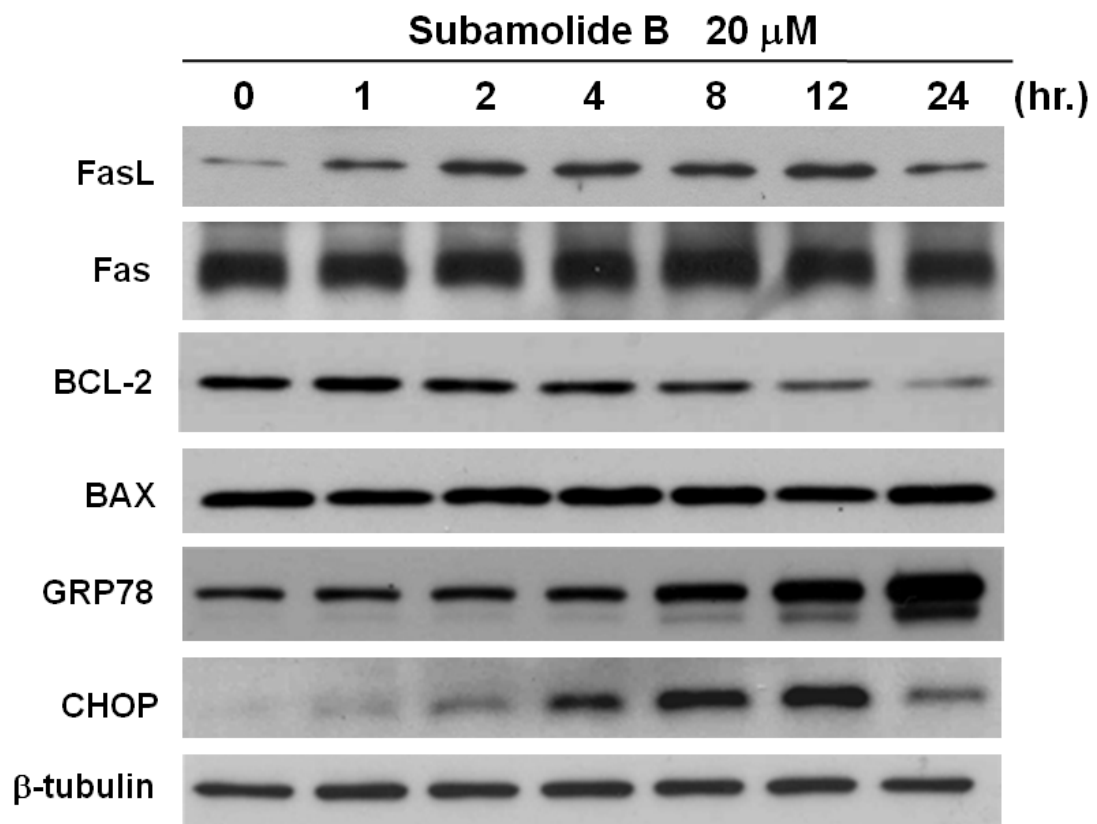

Supplementary Figure 3 (Yang et al.)

**A**

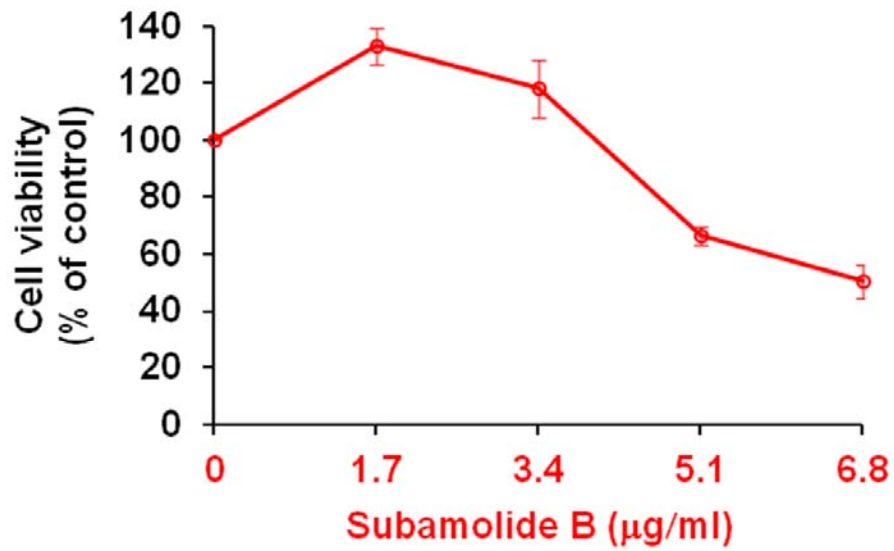

**B**

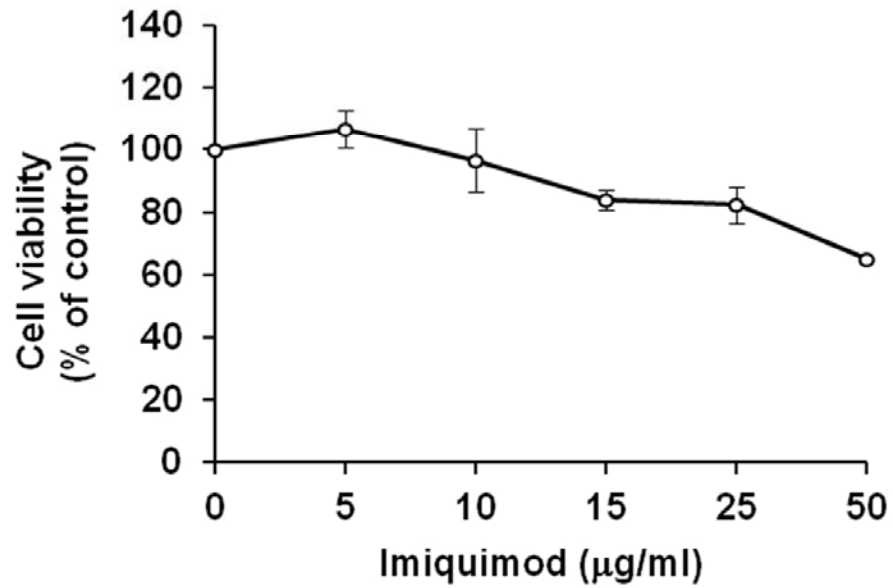

Supplement: f1 [file 630415.f1.pdf]
